# Supplementary material for: Synergism of [C 2 N 4 H 7 S] cations and anionic modulators: tailoring second-order nonlinear optics and birefringence in organic–inorganic crystals
Source: Royal Society of Chemistry journal article supplement (doi:10.1039/d5qi02445e), 2026-01-01
Supplement: d5qi02445e1.pdf [file d5qi02445e1.pdf]

# Synergism of [C<sub>2</sub>N<sub>4</sub>H<sub>7</sub>S] Cation and Anionic Modulators: Tailoring Second-Order Nonlinear Optics and Birefringence in Organic- Inorganic Crystals

Wenjing Zhang,<sup>a</sup> Yumeng Cui,<sup>a</sup> Siyu Li,<sup>a</sup> Bingbing Zhang,<sup>ab\*</sup> and Ying Wang<sup>ab\*</sup>

<sup>a</sup>College of Chemistry and Materials Science, Hebei Research Center of the Basic Discipline of Synthetic Chemistry, Key Laboratory of Medicinal Chemistry and Molecular Diagnosis of the Ministry of Education, Key Laboratory of Chemical Biology of Hebei Province, Hebei University, Baoding 071002, China. Emails: [zhangbb@hbu.edu.cn](mailto:zhangbb@hbu.edu.cn), [wangy@hbu.edu.cn](mailto:wangy@hbu.edu.cn)

<sup>b</sup>Institute of Life Science and Green Development, Hebei University, Baoding 071002, China.

\*Address correspondence to:

E-mail address: [zhangbb@hbu.edu.cn](mailto:zhangbb@hbu.edu.cn) (Bingbing Zhang), [wangy@hbu.edu.cn](mailto:wangy@hbu.edu.cn) (Ying Wang).

## Detail Contents

### A. Experiments and Calculations

### B. Supporting Figures

**Figure S1.** HOMO-LUMO map of  $[\text{C}_2\text{N}_4\text{H}_7\text{S}]$ .

**Figure S2.** The powder X-ray diffraction for (a)  $(\text{C}_2\text{N}_4\text{H}_7\text{S})\text{SO}_3\text{NH}_2$  and (b)  $(\text{C}_2\text{N}_4\text{H}_7\text{S})\text{BF}_4$ .

**Figure S3.** The energy-dispersive X-ray spectroscopy (EDS) element analysis of (a)  $(\text{C}_2\text{N}_4\text{H}_7\text{S})\text{SO}_3\text{NH}_2$  and (b)  $(\text{C}_2\text{N}_4\text{H}_7\text{S})\text{BF}_4$ .

**Figure S4.** The IR spectra of (a)  $(\text{C}_2\text{N}_4\text{H}_7\text{S})\text{SO}_3\text{NH}_2$  and (b)  $(\text{C}_2\text{N}_4\text{H}_7\text{S})\text{BF}_4$ .

**Figure S5.** 2D fingerprint plots for individual interactions of atom types in crystal packing of  $(\text{C}_2\text{N}_4\text{H}_7\text{S})\text{SO}_3\text{NH}_2$ .

**Figure S6.** 2D fingerprint plots for individual interactions of atom types in crystal packing of  $(\text{C}_2\text{N}_4\text{H}_7\text{S})\text{BF}_4$ .

**Figure S7.** The calculated band structures of (a)  $(\text{C}_2\text{N}_4\text{H}_7\text{S})\text{SO}_3\text{NH}_2$  and (b)  $(\text{C}_2\text{N}_4\text{H}_7\text{S})\text{BF}_4$ .

### C. Supporting Tables

**Table S1.** Crystallographic information for  $(\text{C}_2\text{N}_4\text{H}_7\text{S})\text{SO}_3\text{NH}_2$  and  $(\text{C}_2\text{N}_4\text{H}_7\text{S})\text{BF}_4$ .

**Table S2.** Atomic coordinates and  $U_{\text{eq}}$  [ $\text{\AA}^2$ ] for  $(\text{C}_2\text{N}_4\text{H}_7\text{S})\text{SO}_3\text{NH}_2$ .

**Table S3.** Atomic coordinates and  $U_{\text{eq}}$  [ $\text{\AA}^2$ ] for  $(\text{C}_2\text{N}_4\text{H}_7\text{S})\text{BF}_4$ .

**Table S4.** Hydrogen bonds for  $(\text{C}_2\text{N}_4\text{H}_7\text{S})\text{SO}_3\text{NH}_2$ .

**Table S5.** Hydrogen bonds for  $(\text{C}_2\text{N}_4\text{H}_7\text{S})\text{BF}_4$ .

**Table S6.** Bond lengths [ $\text{\AA}$ ] and angles [ $^\circ$ ] for  $(\text{C}_2\text{N}_4\text{H}_7\text{S})\text{SO}_3\text{NH}_2$ .

**Table S7.** Bond lengths [ $\text{\AA}$ ] and angles [ $^\circ$ ] for  $(\text{C}_2\text{N}_4\text{H}_7\text{S})\text{BF}_4$ .

## A. EXPERIMENTS AND CALCULATIONS

**Synthesis.**  $(\text{C}_2\text{N}_4\text{H}_7\text{S})\text{SO}_3\text{NH}_2$  single crystals were synthesized by slow evaporation from an aqueous solution. Amidinothiourea (0.01 mol, 1.18 g) and aminosulfonic acid (0.01 mol, 0.97 g) were dissolved in 20 ml of deionized water and stirred thoroughly at 40 °C for 3 h. After a few days, colorless needle-like crystals were successfully obtained.

The reagents were. Amidinothiourea (0.005 mol, 0.5908 g) and 1 ml of tetrafluoroboric acid were dissolved in 20 ml of anhydrous ethanol and stirred thoroughly at 40 °C for 3 h. After a few days,  $(\text{C}_2\text{N}_4\text{H}_7\text{S})\text{BF}_4$  colorless massive crystals were successfully obtained.

**Structural Characterizations.** The single-crystal XRD data were collected on a Bruker D8 VENTURE diffractometer equipped with a PHOTON II detector and Mo  $\text{I}\mu\text{S}$  3.0microfocus X-ray sources ( $\lambda = 0.71073 \text{ \AA}$ ). The collected data were processed using the Olex2 software.<sup>1, 2</sup> Atomic positions and isotropic thermal parameters were refined using the least squares method according to  $\text{Fo}^2 \geq 2\sigma(\text{Fo}^2)$ . The structures were checked by the program PLATON2 and no higher symmetries were found. The crystallographic information is summarized in Table S1. The atomic coordinates and the anisotropic displacement parameters are available in Table S2 to S3. The selected bond lengths and angles are listed in Table S4.

**Phase Analysis.** Powder XRD data were measured on a Dandong Haoyuan DX-27mini X-ray diffractometer with Cu  $\text{K}\alpha$  radiation ( $\lambda = 1.54056 \text{ \AA}$ ). The powder XRD pattern was scanned over the  $2\theta$  angles range of 5-70 °, at a scanning step width of 0.02 ° and

a fixed counting time of 2 s. EDX microanalysis of the crystal was recorded on a Hitachi TM4000Plus microscopes with the acceleration voltage of 15 kV. In addition, the elemental mapping images were recorded to show the distribution of chemical elements. The IR spectrum of  $(\text{C}_2\text{N}_4\text{H}_7\text{S})\text{SO}_3\text{NH}_2$  and  $(\text{C}_2\text{N}_4\text{H}_7\text{S})\text{BF}_4$  at room temperature was scanned with a Nicolet iS10 spectrometer in the wavelength of 400-4000  $\text{cm}^{-1}$  by potassium bromide tablet pressing method. The IR spectrum of  $(\text{C}_2\text{N}_4\text{H}_7\text{S})\text{BF}_4$  at room temperature was scanned with a Nicolet iS10 spectrometer in the wavelength of 400-4000  $\text{cm}^{-1}$  by potassium bromide tablet pressing method.

**Ultraviolet–Visible diffuse reflectance Spectrum.** The UV-Vis-NIR diffuse reflectance spectrum of  $(\text{C}_2\text{N}_4\text{H}_7\text{S})\text{SO}_3\text{NH}_2$  and  $(\text{C}_2\text{N}_4\text{H}_7\text{S})\text{BF}_4$  were recorded in a Shimadzu UV-2600i spectrometer in the wavelength range of 200-900 nm. The reflectance was converted into absorption using the Kubelka-Munk method:  $(F(R)h\nu)^{1/n} = K/S = (1-R)^2/2R = B(h\nu - E_g)$  (K: absorption coefficient; S: reflectance coefficient; R: reflectivity (in percentage form); h: Planck's constant;  $\nu$ : frequency).

**Thermal Analysis.** Thermogravimetric analysis (TGA) was collected using a NETZSCH STA449F3 thermal analyzer. The crystal samples were heated from 30 to 900 °C at a heating rate of 10 °C  $\text{min}^{-1}$ .

**Birefringence Measurement.** The birefringence was measured by interference color method<sup>3</sup> using a NIKON Eclipse Ci-POL polarizing microscope equipped with Berek compensator calibrated at 546 nm. The birefringence index was calculated by the formula  $R = \Delta n \times d$ , where R,  $\Delta n$  and d are the optical path difference measured by polarizing microscope, the birefringence index and the crystal thickness were measured

by single-crystal X-ray diffraction, respectively.

**SHG responses.** Powder SHG efficiency was measured on a Q-switched Nd: YAG laser with radiation at 1064 nm according to a modified method of Kurtz and Perry.<sup>3, 4</sup> KH<sub>2</sub>PO<sub>4</sub> (KDP) samples in the same particle size ranges were applied as the standard.

**Theoretical Calculations.** The first-principles calculations on electronic structure, band structure, and optical properties of (C<sub>2</sub>N<sub>4</sub>H<sub>7</sub>S)SO<sub>3</sub>NH<sub>2</sub> and (C<sub>2</sub>N<sub>4</sub>H<sub>7</sub>S)BF<sub>4</sub> were carried out by using the CASTEP software package. The generalized gradient approximation (GGA) was adopted, and Perdew-Burke-Ernzerhof (PBE)<sup>5, 6</sup> functional with norm-conserving pseudopotentials was chosen to calculate the exchange-correlation potential. The valences of composed atoms were H:1s<sup>1</sup>, B:2s<sup>2</sup>2p<sup>1</sup>, C:2s<sup>2</sup>2p<sup>2</sup>, N:2s<sup>2</sup>2p<sup>3</sup>, O:2s<sup>2</sup>2p<sup>4</sup>, F:2s<sup>2</sup>2p<sup>5</sup> and S:3s<sup>2</sup>3p<sup>4</sup>. The high kinetic energy cutoff was set as 750eV and dense 2 × 2 × 2 Monkhorst-Pack<sup>7</sup> k-point meshes in the Brillouin zones were adopted. The energy change, maximum force, maximum stress, and maximum displacement in the optimization were set as 1 × 10<sup>-6</sup> eV/atom, 0.03 eV/Å, 0.05 GPa, and 0.001 Å, respectively. The calculations on polarizability anisotropy were conducted using the DFT method, as implemented in the Gaussian09 package<sup>8</sup> at the B3LYP/6-311G level.

## B. Supporting Figures

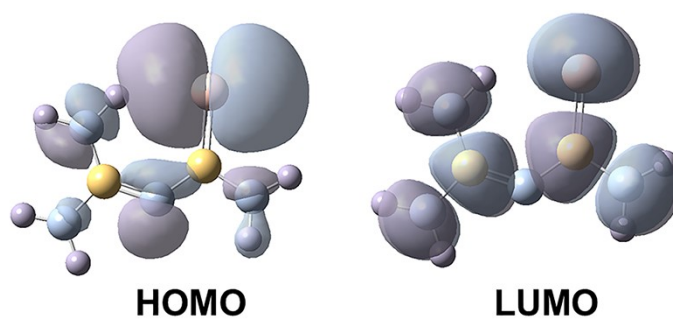

**Figure S1.** HOMO-LUMO map of [C<sub>2</sub>N<sub>4</sub>H<sub>7</sub>S].

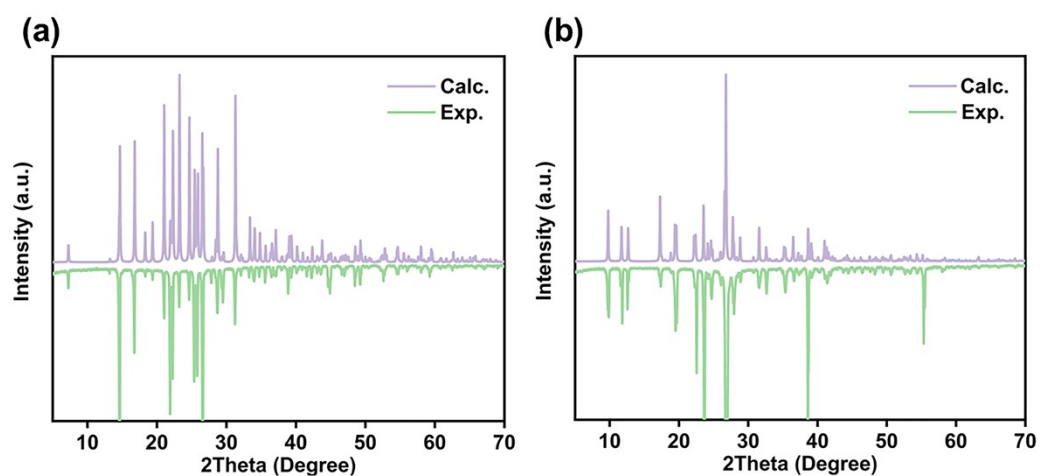

**Figure S2.** The powder X-ray diffraction for (a)  $(\text{C}_2\text{N}_4\text{H}_7\text{S})\text{SO}_3\text{NH}_2$  and (b)  $(\text{C}_2\text{N}_4\text{H}_7\text{S})\text{BF}_4$ .

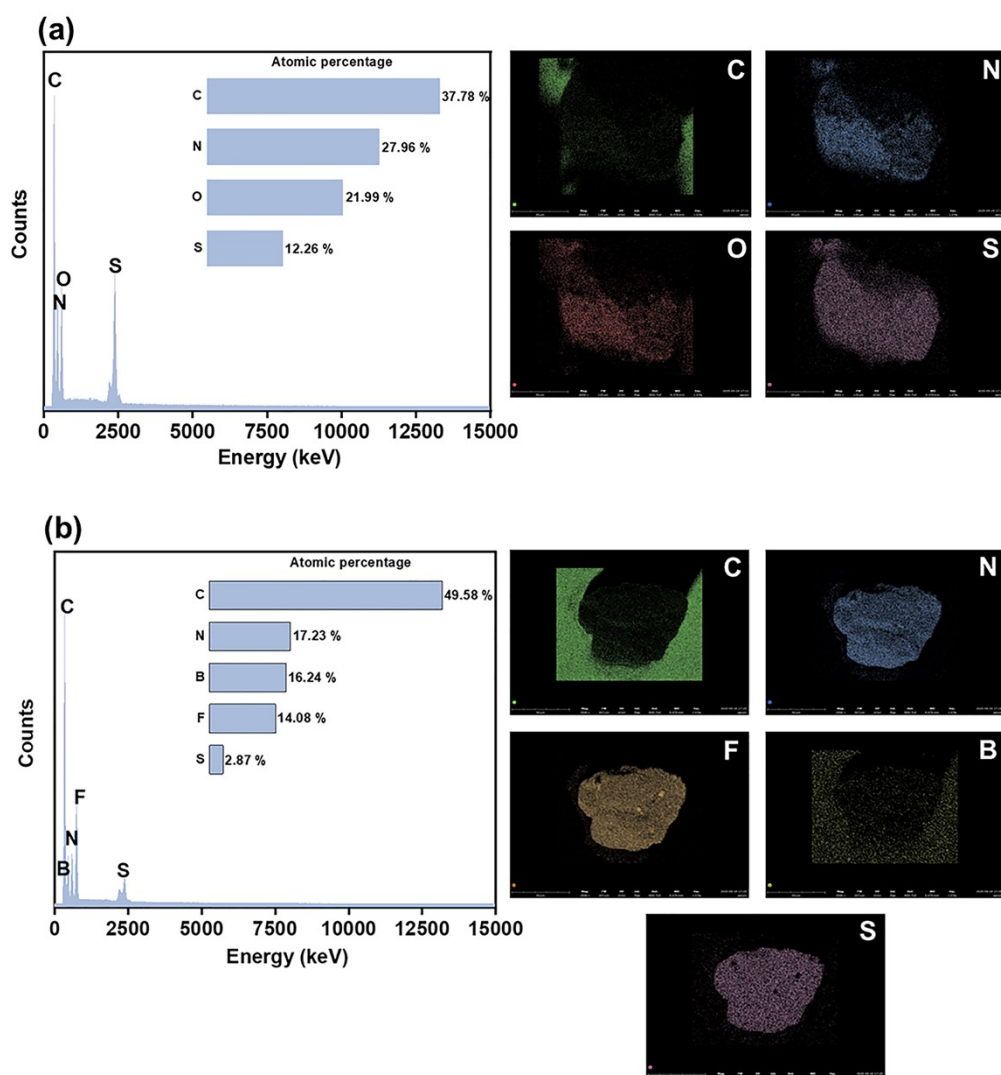

**Figure S3.** The energy-dispersive X-ray spectroscopy (EDS) element analysis of (a)  $(\text{C}_2\text{N}_4\text{H}_7\text{S})\text{SO}_3\text{NH}_2$  and (b)  $(\text{C}_2\text{N}_4\text{H}_7\text{S})\text{BF}_4$ .



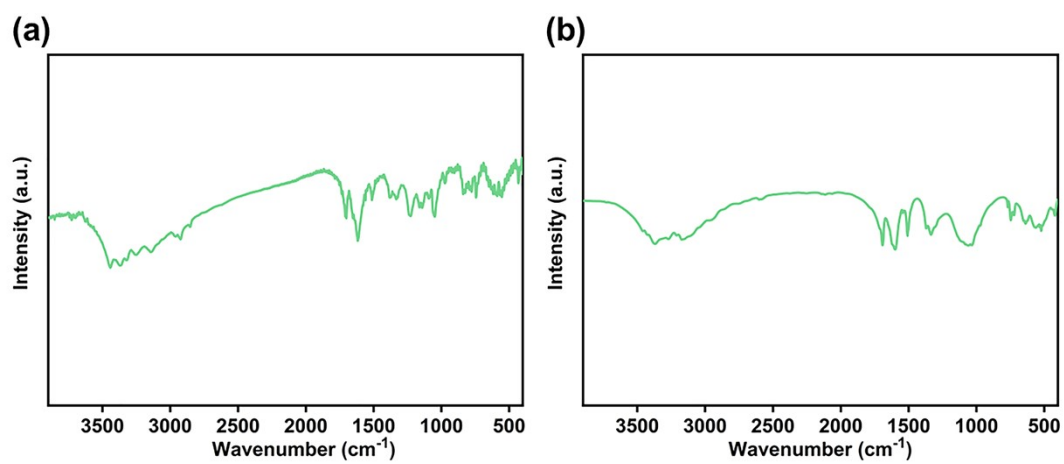

**Figure S4.** The IR spectra of (a) (C<sub>2</sub>N<sub>4</sub>H<sub>7</sub>S)SO<sub>3</sub>NH<sub>2</sub> and (b) (C<sub>2</sub>N<sub>4</sub>H<sub>7</sub>S)BF<sub>4</sub>.

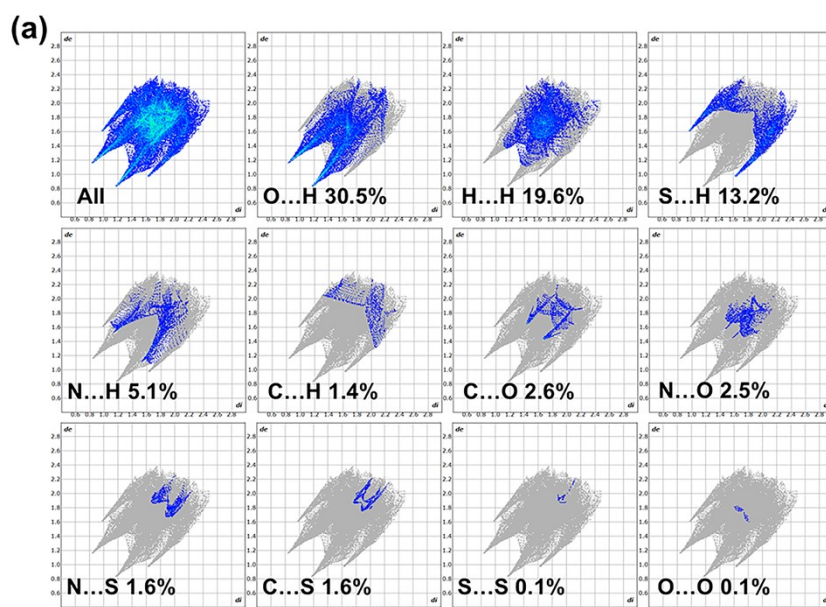

**Figure S5.** 2D fingerprint plots for individual interactions of atom types in crystal packing of  $(\text{C}_2\text{N}_4\text{H}_7\text{S})\text{SO}_3\text{NH}_2$ .

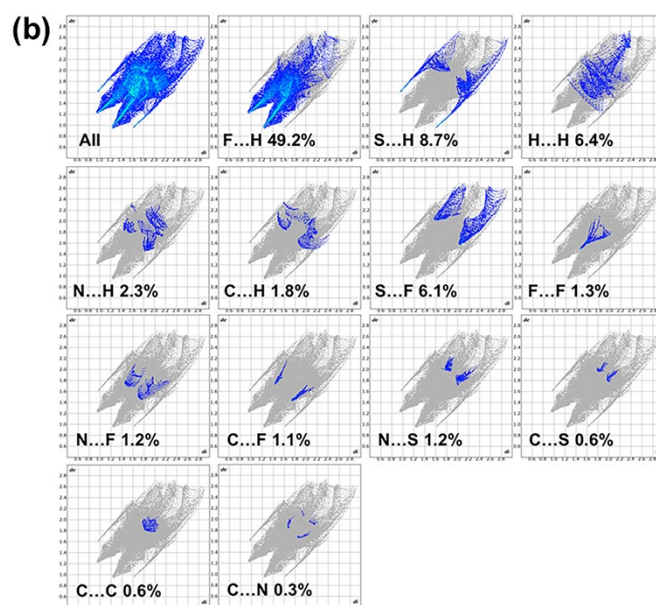

**Figure S6.** 2D fingerprint plots for individual interactions of atom types in crystal packing of  $(C_2N_4H_7S)BF_4$ .

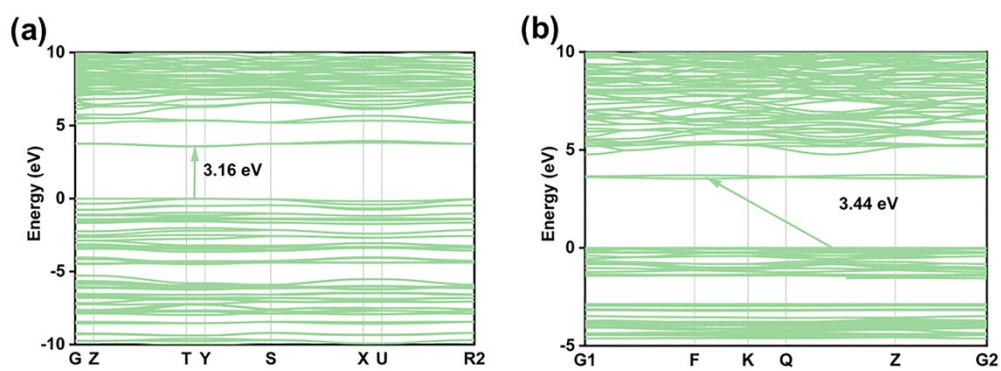

**Figure S7.** The calculated band structures of (a)  $(\text{C}_2\text{N}_4\text{H}_7\text{S})\text{SO}_3\text{NH}_2$  and (b)  $(\text{C}_2\text{N}_4\text{H}_7\text{S})\text{BF}_4$ .

## C. Supporting Tables

**Table S1.** Crystallographic information for (C<sub>2</sub>N<sub>4</sub>H<sub>7</sub>S)SO<sub>3</sub>NH<sub>2</sub> and (C<sub>2</sub>N<sub>4</sub>H<sub>7</sub>S)BF<sub>4</sub>.

| Empirical formula                                       | (C <sub>2</sub> N <sub>4</sub> H <sub>7</sub> S)SO <sub>3</sub> NH <sub>2</sub> | (C <sub>2</sub> N <sub>4</sub> H <sub>7</sub> S)BF <sub>4</sub> |
|---------------------------------------------------------|---------------------------------------------------------------------------------|-----------------------------------------------------------------|
| Formula weight                                          | 215.26                                                                          | 205.99                                                          |
| Temperature [K]                                         | 301(2)                                                                          | 301(2)                                                          |
| Crystal system                                          | orthorhombic                                                                    | triclinic                                                       |
| Space group (number)                                    | <i>P</i> 2 <sub>1</sub> 2 <sub>1</sub> 2 <sub>1</sub> (19)                      | <i>P</i> $\bar{1}$ (2)                                          |
| <i>a</i> [Å]                                            | 4.940(2)                                                                        | 5.6916(4)                                                       |
| <i>b</i> [Å]                                            | 6.946(3)                                                                        | 8.2102(5)                                                       |
| <i>c</i> [Å]                                            | 24.305(12)                                                                      | 9.5356(7)                                                       |
| $\alpha$ [°]                                            | 90                                                                              | 107.538(3)                                                      |
| $\beta$ [°]                                             | 90                                                                              | 91.200(3)                                                       |
| $\gamma$ [°]                                            | 90                                                                              | 104.227(3)                                                      |
| Volume [Å <sup>3</sup> ]                                | 834.0(7)                                                                        | 409.67(5)                                                       |
| <i>Z</i>                                                | 4                                                                               | 2                                                               |
| $\rho_{\text{calc}}$ [gcm <sup>-3</sup> ]               | 1.714                                                                           | 1.670                                                           |
| $\mu$ [mm <sup>-1</sup> ]                               | 0.618                                                                           | 0.415                                                           |
| <i>F</i> (000)                                          | 448                                                                             | 208                                                             |
| Index ranges                                            | $-6 \leq h \leq 6$                                                              | $-7 \leq h \leq 7$                                              |
|                                                         | $-8 \leq k \leq 8$                                                              | $-10 \leq k \leq 10$                                            |
|                                                         | $-31 \leq l \leq 31$                                                            | $-12 \leq l \leq 12$                                            |
| Reflections collected                                   | 4283                                                                            | 25075                                                           |
|                                                         | 1852                                                                            | 1890                                                            |
| Independent reflections                                 | <i>R</i> <sub>int</sub> = 0.0474                                                | <i>R</i> <sub>int</sub> = 0.0574                                |
|                                                         | <i>R</i> <sub>sigma</sub> = 0.0661                                              | <i>R</i> <sub>sigma</sub> = 0.0229                              |
| Completeness to<br>theta                                | 99.8 %                                                                          | 100.0 %                                                         |
| Data / Restraints /<br>Parameters                       | 1852 / 2 / 115                                                                  | 1890 / 0 / 110                                                  |
| Goodness-of-fit on <i>F</i> <sup>2</sup>                | 1.037                                                                           | 1.029                                                           |
| R/wR ( <i>I</i> > 2 $\sigma$ ( <i>I</i> )) <sup>a</sup> | <i>R</i> <sub>1</sub> = 0.0475                                                  | <i>R</i> <sub>1</sub> = 0.0389                                  |
|                                                         | w <i>R</i> <sub>2</sub> = 0.0845                                                | w <i>R</i> <sub>2</sub> = 0.0760                                |
| R/wR (all data) <sup>a</sup>                            | <i>R</i> <sub>1</sub> = 0.0738                                                  | <i>R</i> <sub>1</sub> = 0.0603                                  |
|                                                         | w <i>R</i> <sub>2</sub> = 0.0953                                                | w <i>R</i> <sub>2</sub> = 0.0863                                |
| Largest peak/hole [eÅ <sup>-3</sup> ]                   | 0.32/−0.35                                                                      | 0.24/−0.19                                                      |
| Flack X parameter                                       | 0.07(11)                                                                        | /                                                               |

<sup>a</sup>  $R_1 = F_o - F_c/F_o$  and  $wR_2 = [w (F_o^2 - F_c^2)^2 / wF_o^4]^{1/2}$  for  $F_o^2 > 2(F_c^2)$ .

**Table S2.** Atomic coordinates and  $U_{\text{eq}}$  [ $\text{\AA}^2$ ] for  $(\text{C}_2\text{N}_4\text{H}_7\text{S})\text{SO}_3\text{NH}_2$ .

| Atom | $x$         | $y$          | $z$         | $U_{\text{eq}}$ |
|------|-------------|--------------|-------------|-----------------|
| S2   | 0.0931(2)   | −0.16531(18) | 0.31581(5)  | 0.0324(3)       |
| S1   | 0.2464(3)   | 0.04929(19)  | 0.48538(6)  | 0.0407(4)       |
| N1   | 0.6232(9)   | −0.1562(6)   | 0.43742(17) | 0.0432(11)      |
| H1A  | 0.747955    | −0.171786    | 0.413155    | 0.052           |
| H1B  | 0.588036    | −0.246589    | 0.460510    | 0.052           |
| N2   | 0.5722(8)   | 0.1337(5)    | 0.39875(15) | 0.0297(9)       |
| H2   | 0.716778    | 0.100649     | 0.381451    | 0.036           |
| N3   | 0.2579(9)   | 0.3839(5)    | 0.40843(17) | 0.0385(10)      |
| H3A  | 0.193928    | 0.491820     | 0.396937    | 0.046           |
| H3B  | 0.188521    | 0.329159     | 0.436858    | 0.046           |
| N4   | 0.5686(9)   | 0.3860(6)    | 0.33902(17) | 0.0426(11)      |
| H4A  | 0.505551    | 0.493901     | 0.327321    | 0.051           |
| H4B  | 0.701919    | 0.332131     | 0.322274    | 0.051           |
| N5   | −0.0678(10) | −0.1862(7)   | 0.25755(19) | 0.0435(11)      |
| H5A  | −0.036(12)  | −0.299(5)    | 0.247(2)    | 0.052           |
| H5B  | −0.236(5)   | −0.175(8)    | 0.261(2)    | 0.052           |
| C1   | 0.4608(10)  | 0.3031(7)    | 0.38267(19) | 0.0300(11)      |
| C2   | 0.4863(10)  | 0.0058(7)    | 0.4392(2)   | 0.0300(11)      |
| O1   | 0.3737(7)   | −0.1972(6)   | 0.30274(17) | 0.0573(12)      |
| O2   | 0.0295(7)   | 0.0289(5)    | 0.33317(14) | 0.0408(9)       |
| O3   | −0.0080(7)  | −0.3047(5)   | 0.35579(15) | 0.0461(10)      |

$U_{\text{eq}}$  is defined as 1/3 of the trace of the orthogonalized  $U_{ij}$  tensor.

**Table S3.** Atomic coordinates and  $U_{\text{eq}}$  [ $\text{\AA}^2$ ] for  $(\text{C}_2\text{N}_4\text{H}_7\text{S})\text{BF}_4$ .

| Atom | $x$         | $y$         | $z$         | $U_{\text{eq}}$ |
|------|-------------|-------------|-------------|-----------------|
| S1   | 0.34638(11) | 0.72499(8)  | 0.07465(7)  | 0.0540(2)       |
| F1   | −0.3492(2)  | 0.12594(17) | 0.43574(15) | 0.0606(4)       |
| F2   | −0.5498(3)  | 0.2039(2)   | 0.2718(2)   | 0.0896(6)       |
| F3   | −0.1474(3)  | 0.2284(2)   | 0.2681(2)   | 0.0906(6)       |
| F4   | −0.2850(3)  | 0.41399(18) | 0.44998(19) | 0.0880(5)       |
| N1   | 0.0044(3)   | 0.9019(2)   | 0.2555(2)   | 0.0574(5)       |
| H1A  | −0.059706   | 0.989552    | 0.283911    | 0.069           |
| H1B  | 0.115332    | 0.903806    | 0.195683    | 0.069           |
| N2   | −0.2356(3)  | 0.7611(2)   | 0.3941(2)   | 0.0526(5)       |
| H2A  | −0.301615   | 0.847543    | 0.423686    | 0.063           |
| H2B  | −0.280336   | 0.670538    | 0.424367    | 0.063           |
| N3   | 0.0314(3)   | 0.6267(2)   | 0.26179(18) | 0.0411(4)       |
| H3   | −0.026639   | 0.544913    | 0.300271    | 0.049           |
| N4   | 0.2629(3)   | 0.4444(2)   | 0.1607(2)   | 0.0548(5)       |
| H4A  | 0.189488    | 0.379503    | 0.210856    | 0.066           |
| H4B  | 0.371309    | 0.411667    | 0.105511    | 0.066           |
| C1   | −0.0662(3)  | 0.7673(2)   | 0.3026(2)   | 0.0396(4)       |
| C2   | 0.2093(3)   | 0.5935(2)   | 0.1683(2)   | 0.0379(4)       |
| B1   | −0.3358(4)  | 0.2417(3)   | 0.3550(3)   | 0.0447(6)       |

$U_{\text{eq}}$  is defined as 1/3 of the trace of the orthogonalized  $U_{ij}$  tensor.

**Table S4.** Hydrogen bonds for (C<sub>2</sub>N<sub>4</sub>H<sub>7</sub>S)SO<sub>3</sub>NH<sub>2</sub>.

| <b>D–H···A [Å]</b> | <b>d(D–H) [Å]</b> | <b>d(H···A) [Å]</b> | <b>d(D···A) [Å]</b> | <b>&lt;(DHA) [°]</b> |
|--------------------|-------------------|---------------------|---------------------|----------------------|
| N1–H1A···S2#1      | 0.86              | 2.92                | 3.759(5)            | 166.8                |
| N1–H1A···O3#1      | 0.86              | 2.06                | 2.885(6)            | 160.0                |
| N1–H1B···S1#2      | 0.86              | 2.60                | 3.369(4)            | 149.3                |
| N4–H4A···O1#3      | 0.86              | 2.32                | 3.176(6)            | 173.0                |
| N4–H4B···N5#4      | 0.86              | 2.65                | 3.441(6)            | 152.7                |
| N3–H3A···O3#3      | 0.86              | 2.00                | 2.836(5)            | 164.2                |
| N3–H3B···S1        | 0.86              | 2.29                | 2.984(4)            | 137.6                |
| N3–H3B···S1#5      | 0.86              | 3.01                | 3.642(5)            | 132.0                |
| N2–H2···O2#1       | 0.86              | 2.00                | 2.859(5)            | 173.4                |
| N5–H5A···S2#6      | 0.84(2)           | 2.98(3)             | 3.777(5)            | 160(5)               |
| N5–H5A···O2#6      | 0.84(2)           | 2.28(4)             | 2.969(6)            | 140(5)               |
| N5–H5B···O1#7      | 0.84(2)           | 2.18(3)             | 2.971(6)            | 157(5)               |

Symmetry transformations used to generate equivalent atoms:

#1: 1+X, +Y, +Z; #2: 0.5+X, -0.5-Y, 1-Z; #3: +X, 1+Y, +Z; #4: 1-X, 0.5+Y, 0.5-Z; #5:  
-0.5+X, 0.5-Y, 1-Z; #6: -X, -0.5+Y, 0.5-Z; #7: -1+X, +Y, +Z;



**Table S5.** Hydrogen bonds for (C<sub>2</sub>N<sub>4</sub>H<sub>7</sub>S)BF<sub>4</sub>.

| <b>D–H···A [Å]</b> | <b>d(D–H) [Å]</b> | <b>d(H···A) [Å]</b> | <b>d(D···A) [Å]</b> | <b>&lt;(DHA) [°]</b> |
|--------------------|-------------------|---------------------|---------------------|----------------------|
| N1–H1A···F1#1      | 0.86              | 2.47                | 3.232(2)            | 148.3                |
| N1–H1A···F3#1      | 0.86              | 2.19                | 2.982(2)            | 154.1                |
| N1–H1B···S1        | 0.86              | 2.28                | 2.9822(18)          | 138.6                |
| N1–H1B···F2#2      | 0.86              | 2.61                | 3.045(2)            | 112.9                |
| N2–H2A···F1#1      | 0.86              | 2.34                | 3.130(2)            | 153.6                |
| N2–H2A···F1#3      | 0.86              | 2.44                | 3.067(2)            | 130.5                |
| N2–H2B···F4        | 0.86              | 2.19                | 3.002(2)            | 158.2                |
| N3–H3···F3         | 0.86              | 2.44                | 3.197(2)            | 147.2                |
| N3–H3···F4         | 0.86              | 2.36                | 3.161(2)            | 154.2                |
| N4–H4A···F2#4      | 0.86              | 2.48                | 2.899(2)            | 111.0                |
| N4–H4A···F3        | 0.86              | 2.19                | 2.967(2)            | 150.2                |
| N4–H4B···S1#5      | 0.86              | 2.58                | 3.4298(18)          | 172.5                |

Symmetry transformations used to generate equivalent atoms:

#1: +X, 1+Y, +Z; #2: 1+X, 1+Y, +Z; #3: -1-X, 1-Y, 1-Z; #4: 1+X, +Y, +Z; #5: 1-X, 1-Y, -Z;

**Table S6.** Bond lengths [Å] and angles [°] for (C<sub>2</sub>N<sub>4</sub>H<sub>7</sub>S)SO<sub>3</sub>NH<sub>2</sub>.

| Atom–Atom | Length [Å] | Atom–Atom–Atom | Angle [°] |
|-----------|------------|----------------|-----------|
| S2–O1     | 1.439(4)   | O1–S2–O2       | 114.6(2)  |
| S2–O2     | 1.448(4)   | O1–S2–O3       | 112.0(3)  |
| S2–O3     | 1.460(4)   | O2–S2–O3       | 110.5(2)  |
| S2–N5     | 1.631(5)   | O1–S2–N5       | 105.3(3)  |
| S1–C2     | 1.660(5)   | O2–S2–N5       | 103.3(2)  |
| N1–C2     | 1.313(6)   | O3–S2–N5       | 110.6(2)  |
| N1–H1A    | 0.8600     | C2–N1–H1A      | 120.0     |
| N1–H1B    | 0.8600     | C2–N1–H1B      | 120.0     |
| N2–C1     | 1.357(6)   | H1A–N1–H1B     | 120.0     |
| N2–C2     | 1.392(6)   | C1–N2–C2       | 129.3(4)  |
| N2–H2     | 0.8600     | C1–N2–H2       | 115.3     |
| N3–C1     | 1.308(6)   | C2–N2–H2       | 115.3     |
| N3–H3A    | 0.8600     | C1–N3–H3A      | 120.0     |
| N3–H3B    | 0.8600     | C1–N3–H3B      | 120.0     |
| N4–C1     | 1.319(6)   | H3A–N3–H3B     | 120.0     |
| N4–H4A    | 0.8600     | C1–N4–H4A      | 120.0     |
| N4–H4B    | 0.8600     | C1–N4–H4B      | 120.0     |
| N5–H5A    | 0.84(2)    | H4A–N4–H4B     | 120.0     |
| N5–H5B    | 0.84(2)    | S2–N5–H5A      | 105(4)    |
|           |            | S2–N5–H5B      | 112(4)    |
|           |            | H5A–N5–H5B     | 108(6)    |
|           |            | N3–C1–N4       | 120.5(4)  |
|           |            | N3–C1–N2       | 123.0(4)  |
|           |            | N4–C1–N2       | 116.5(4)  |
|           |            | N1–C2–N2       | 111.5(4)  |
|           |            | N1–C2–S1       | 123.1(4)  |
|           |            | N2–C2–S1       | 125.4(4)  |

**Table S7.** Bond lengths [Å] and angles [°] for (C<sub>2</sub>N<sub>4</sub>H<sub>7</sub>S)BF<sub>4</sub>.

| Atom–Atom | Length [Å] | Atom–Atom–Atom | Angle [°]  |
|-----------|------------|----------------|------------|
| S1–C2     | 1.6635(19) | C1–N1–H1A      | 120.0      |
| F1–B1     | 1.381(2)   | C1–N1–H1B      | 120.0      |
| F2–B1     | 1.355(3)   | H1A–N1–H1B     | 120.0      |
| F3–B1     | 1.374(3)   | C1–N2–H2A      | 120.0      |
| F4–B1     | 1.386(3)   | C1–N2–H2B      | 120.0      |
| N1–C1     | 1.294(2)   | H2A–N2–H2B     | 120.0      |
| N1–H1A    | 0.8600     | C1–N3–C2       | 130.59(16) |
| N1–H1B    | 0.8600     | C1–N3–H3       | 114.7      |
| N2–C1     | 1.316(2)   | C2–N3–H3       | 114.7      |
| N2–H2A    | 0.8600     | C2–N4–H4A      | 120.0      |
| N2–H2B    | 0.8600     | C2–N4–H4B      | 120.0      |
| N3–C1     | 1.358(2)   | H4A–N4–H4B     | 120.0      |
| N3–C2     | 1.386(2)   | N1–C1–N2       | 121.22(18) |
| N3–H3     | 0.8600     | N1–C1–N3       | 122.05(18) |
| N4–C2     | 1.315(2)   | N2–C1–N3       | 116.73(17) |
| N4–H4A    | 0.8600     | N4–C2–N3       | 112.74(17) |
| N4–H4B    | 0.8600     | N4–C2–S1       | 122.14(15) |
|           |            | N3–C2–S1       | 125.11(14) |
|           |            | F2–B1–F3       | 111.1(2)   |
|           |            | F2–B1–F1       | 110.36(18) |
|           |            | F3–B1–F1       | 108.40(17) |
|           |            | F2–B1–F4       | 109.05(18) |
|           |            | F3–B1–F4       | 108.10(19) |
|           |            | F1–B1–F4       | 109.8(2)   |

## References

1. O. Dolomanov, L. Bourhis, R. Gildea, J. Howard and H. Puschmann, OLEX2: A complete structure solution, refinement and analysis program, *J. Appl. Cryst.*, 2009, **42**, 339-341.
2. G. M. Sheldrick, A short history of SHELX, *Acta Crystallogr A*, 2008, **64**, 112-122.
3. S. Kurtz and T. Perry, A powder technique for the evaluation of nonlinear optical materials, *IEEE J. Quantum Electron.*, 1968, **4**, 333-333.
4. M. Sun, G. Wang and J. Yao, The Kurtz-Perry powder technique revisited: a study of the effect of reference selection on powder second-harmonic generation response, *Molecules*, 2023, **28**, 1116.
5. L. Kleinman and D. M. Bylander, Efficacious form for model pseudopotentials, *Phys. Rev. Lett.*, 1982, **48**, 1425-1428.
6. A. M. Rappe, K. M. Rabe, E. Kaxiras and J. D. Joannopoulos, Optimized pseudopotentials, *Phys. Rev. B*, 1990, **41**, 1227-1230.
